# Supplementary material for: Formulation, evaluation and bioactive potential of Xylaria primorskensis terpenoid nanoparticles from its major compound xylaranic acid
Source: PubMed Central journal article supplement (PMC5789059; doi:10.1038/s41598-018-20237-z), 2018-01-29
Supplement: 41598_2018_20237_MOESM1_ESM.pdf [file 41598_2018_20237_MOESM1_ESM.pdf]

**Formulation, evaluation and bioactive potential of *Xylaria primorskensis* terpenoid nanoparticles from its major compound xylaranic acid**

**Mohd Adnan, Mitesh Patel, Mandadi Narsimha Reddy, Eyad Alshammari**

## Supplementary Information

**Supplementary Data S1:**  $^1\text{H}$ -NMR spectra and  $^{13}\text{C}$ -NMR spectra (chemical shift values)

Xylaranic acid - light yellowish oil (MeOH).  $^1\text{H}$  NMR (600 MHz, in  $\text{CDCl}_3$ )  $\delta$  0.92 (3H, d,  $J = 6.7$  Hz), 1.24 (3H, s), 1.46-1.78 (4H, 1.54 (ddd,  $J = 13.2, 10.0, 5.8$  Hz), 1.66 (ddd,  $J = 13.2, 1.8, 1.4$  Hz), 1.74 (dd,  $J = 13.1, 2.3$  Hz), 1.57 (dd,  $J = 13.1, 10.2$  Hz)), 1.91 (1H, qdd,  $J = 6.7, 5.8, 1.4$  Hz), 2.06 (1H, dddd,  $J = 10.2, 5.2, 3.5, 2.3$  Hz), 2.38-2.58 (2H, 2.44 (dd,  $J = 15.2, 5.7$  Hz), 2.51 (dd,  $J = 15.2, 8.9$  Hz)), 2.95 (1H, td,  $J = 5.8, 5.2$  Hz), 3.70-3.74 (2H, 3.72 (d,  $J = 5.8$  Hz), 3.72 (d,  $J = 5.8$  Hz)), 3.88 (1H, dddd,  $J = 10.0, 8.9, 5.7, 1.8$  Hz), 4.21 (1H, dd,  $J = 6.8, 3.5$  Hz), 5.08 (1H, d,  $J = 6.8$  Hz).  $^{13}\text{C}$  NMR (150 MHz, in  $\text{CDCl}_3$ ):  $\delta$  41.9(C-1), 15.8(C-2), 152.3(C-3), 35.2(C-4), 40.9(C-5), 178.0(C-6), 36.0(C-7), 41.3(C-8), 62.3(C-9), 44.9(C-10), 120.0(C-11), 39.4(C-12), 69.0(C-13), 16.3(C-14), 68.1(C-15).

**Supplementary Figure S2**

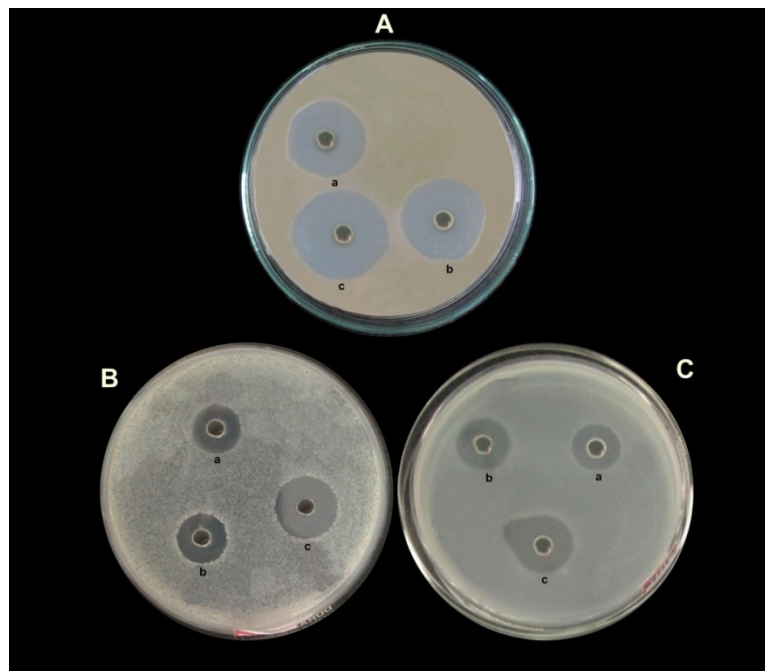

**Supplementary Figure S2:** Antibacterial activity of xyloaranic acid and xyloaranic acid AgNPs by agar cup/well diffusion method.

A) Antibacterial activity against *S. aureus* a). Positive control b). Xyloaranic acid c).

Xyloaranic acid AgNPs

B) Antibacterial activity against *S. typhi* a). Positive control b). Xyloaranic acid c).

Xyloaranic acid AgNPs

C) A). Antibacterial activity against *S. flexneri* a). Positive control b). Xyloaranic acid

c). Xyloaranic acid AgNPs.

**Supplementary Figure S3**

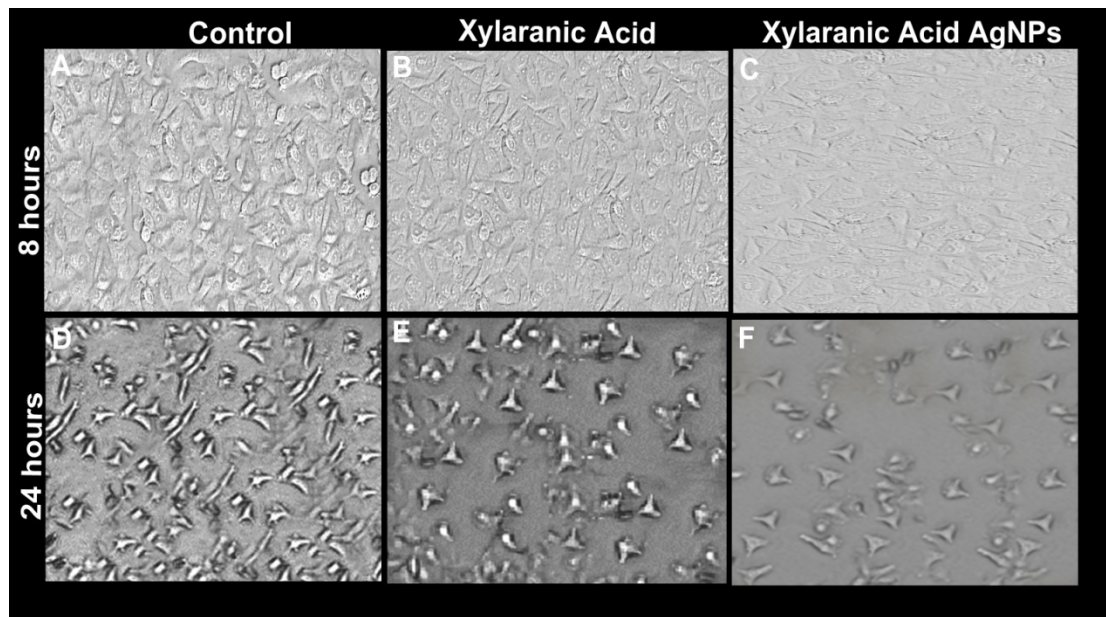

**Supplementary Figure S3:** The effects of xylaranic acid and its AgNPs on lung cancer cell (A549).

(A&D)- Treatment of cells with 5-flourouracil for 8 and 24 hours.

(B&E)- Treatment of cells with xylaranic acid (100  $\mu\text{g/ml}$ ) for 8 and 24 hours.

(C&F)- Treatment of cells with xylaranic acid AgNPs (100  $\mu\text{g/ml}$ ) for 8 and 24 hours.

**Supplementary Figure S4**

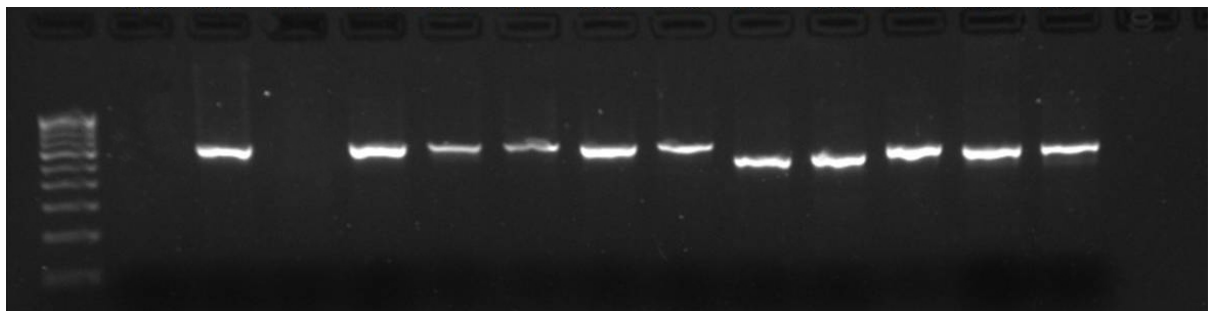

**Supplementary Figure S4:** Original gel image (Figure 3).
